# Supplementary material
Source: PubMed Central journal article supplement (PMC5384486)
Supplement: DS_10.1177_0022034516680771.pdf [file DS_10.1177_0022034516680771.pdf]

## Saliva and Serum Protein Exchange at the Tooth Enamel Surface

D. Heller, E.J. Helmerhorst, and F.G. Oppenheim

### APPENDIX

**Appendix Table 1A. Saliva proteins adsorbed to hydroxyapatite identified in stained protein bands.**

|                         | Unique peptides | Total peptides | Reference          | Gene Symbol | MW (kDa) | Name                            | Glycosylated | Phosphorylated | Theoretical pI |
|-------------------------|-----------------|----------------|--------------------|-------------|----------|---------------------------------|--------------|----------------|----------------|
| <b>Band 1 (6.9 kDa)</b> |                 |                |                    |             |          |                                 |              |                |                |
|                         | 2               | 2              | Q07020_RL18_HUMAN  | RPL18       | 21.62    | 60S ribosomal protein L18       | No           | Yes            | 11.73          |
| <b>Band 2 (9.7 kDa)</b> |                 |                |                    |             |          |                                 |              |                |                |
|                         | 3               | 3              | P01620_KV302_HUMAN | N/A         | 11.77    | Ig kappa chain V-III region SIE | No           | No             | 8.7            |
|                         | 3               | 3              | P02760_AMBP_HUMAN  | AMBP        | 38.97    | Protein AMBP                    | Yes          | No             | 6.13           |
|                         | 2               | 3              | P01834_IGKC_HUMAN  | IGKC        | 11.6     | Ig kappa chain C region         | No           | No             | 5.58           |
|                         | 2               | 2              | Q07020_RL18_HUMAN  | RPL18       | 21.62    | 60S ribosomal protein L18       | No           | Yes            | 11.73          |
|                         | 2               | 2              | P07355_ANXA2_HUMAN | ANXA2       | 38.58    | Annexin A2                      | No           | Yes            | 7.56           |
| <b>Band 3 (12 kDa)</b>  |                 |                |                    |             |          |                                 |              |                |                |
|                         | 4               | 4              | P10599_THIO_HUMAN  | TXN         | 11.73    | Thioredoxin                     | No           | No             | 4.82           |
|                         | 4               | 4              | P12273_PIP_HUMAN   | PIP         | 16.56    | Prolactin-inducible protein     | Yes          | No             | 5.4            |
|                         | 3               | 4              | P01834_IGKC_HUMAN  | IGKC        | 11.6     | Ig kappa chain C region         | No           | No             | 5.58           |
|                         | 3               | 4              | P61769_B2MG_HUMAN  | B2M         | 13.71    | Beta-2-microglobulin            | Yes          | No             | 6.07           |
|                         | 3               | 3              | P01876_IGHA1_HUMAN | IGHA1       | 37.63    | Ig alpha-1 chain C region       | Yes          | No             | 6.08           |
|                         | 3               | 3              | P07355_ANXA2_HUMAN | ANXA2       | 38.58    | Annexin A2                      | No           | Yes            | 7.56           |
|                         | 3               | 3              | P02760_AMBP_HUMAN  | AMBP        | 38.97    | Protein AMBP                    | Yes          | No             | 6.13           |
|                         | 2               | 2              | P01620_KV302_HUMAN | N/A         | 11.77    | Ig kappa chain V-III region SIE | No           | No             | 8.7            |
|                         | 2               | 2              | P62805_H4_HUMAN    | HIST1H4A    | 11.36    | Histone H4                      | No           | Yes            | 11.36          |
|                         | 2               | 2              | P01036_CYTS_HUMAN  | CST4        | 16.2     | Cystatin-S                      | No           | Yes            | 4.83           |
| <b>Band 4 (16 kDa)</b>  |                 |                |                    |             |          |                                 |              |                |                |
|                         | 6               | 30             | P01036_CYTS_HUMAN  | CST4        | 16.2     | Cystatin-S                      | No           | Yes            | 4.83           |
|                         | 3               | 4              | P02760_AMBP_HUMAN  | AMBP        | 38.97    | Protein AMBP                    | Yes          | No             | 6.13           |
|                         | 3               | 3              | P01620_KV302_HUMAN | N/A         | 11.77    | Ig kappa chain V-III region SIE | No           | No             | 8.7            |
|                         | 3               | 3              | P01037_CYTN_HUMAN  | CST1        | 16.38    | Cystatin-SN                     | No           | No             | 6.92           |

|                           |   |    |                    |       |       |                                                                     |     |     |      |
|---------------------------|---|----|--------------------|-------|-------|---------------------------------------------------------------------|-----|-----|------|
|                           | 3 | 3  | P12273_PIP_HUMAN   | PIP   | 16.56 | Prolactin-inducible protein                                         | Yes | No  | 5.4  |
|                           | 2 | 3  | P01834_IGKC_HUMAN  | IGKC  | 11.6  | Ig kappa chain C region                                             | No  | No  | 5.58 |
|                           | 2 | 2  | P68871_HBB_HUMAN   | HBB   | 15.99 | Hemoglobin subunit beta                                             | Yes | Yes | 6.81 |
|                           | 2 | 2  | P04080_CYTBB_HUMAN | CSTB  | 11.13 | Cystatin-B                                                          | No  | No  | 6.96 |
|                           | 2 | 2  | P07355_ANXA2_HUMAN | ANXA2 | 38.58 | Annexin A2                                                          | No  | Yes | 7.56 |
| <b>Band 5 (20 kDa)</b>    |   |    |                    |       |       |                                                                     |     |     |      |
|                           | 4 | 12 | P01036_CYTS_HUMAN  | CST4  | 16.2  | Cystatin-S                                                          | No  | Yes | 4.83 |
|                           | 4 | 4  | P12273_PIP_HUMAN   | PIP   | 16.56 | Prolactin-inducible protein                                         | Yes | No  | 5.4  |
|                           | 4 | 4  | P02808_STAT_HUMAN  | STHAT | 6-Jan | Statherin                                                           | No  | Yes | 6.25 |
|                           | 3 | 4  | P01834_IGKC_HUMAN  | IGKC  | 11.6  | Ig kappa chain C region                                             | No  | No  | 5.58 |
|                           | 3 | 4  | P07355_ANXA2_HUMAN | ANXA2 | 38.58 | Annexin A2                                                          | No  | Yes | 7.56 |
|                           | 3 | 3  | P01620_KV302_HUMAN | N/A   | 11.77 | Ig kappa chain V-III region SIE                                     | No  | No  | 8.7  |
|                           | 2 | 2  | P68871_HBB_HUMAN   | HBB   | 15.99 | Hemoglobin subunit beta                                             | Yes | Yes | 6.81 |
|                           | 2 | 2  | P01876_IGHA1_HUMAN | IGHA1 | 37.63 | Ig alpha-1 chain C region                                           | Yes | No  | 6.08 |
|                           | 2 | 2  | P69905_HBA_HUMAN   | HBA1  | 15.25 | Hemoglobin subunit alpha                                            | Yes | Yes | 8.73 |
| <b>Band 6 (21 kDa)</b>    |   |    |                    |       |       |                                                                     |     |     |      |
|                           | 4 | 4  | P12273_PIP_HUMAN   | PIP   | 16.56 | Prolactin-inducible protein                                         | Yes | No  | 5.4  |
|                           | 3 | 4  | P01834_IGKC_HUMAN  | IGKC  | 11.6  | Ig kappa chain C region                                             | No  | No  | 5.58 |
|                           | 2 | 3  | P02760_AMBP_HUMAN  | AMBP  | 38.97 | Protein AMBP                                                        | Yes | No  | 6.13 |
|                           | 2 | 2  | P01620_KV302_HUMAN | N/A   | 11.77 | Ig kappa chain V-III region SIE                                     | No  | No  | 8.7  |
|                           | 2 | 2  | P23284_PPIB_HUMAN  | PPIB  | 23.73 | Peptidyl-prolyl cis-trans isomerase B                               | Yes | No  | 9.25 |
|                           | 2 | 2  | P07355_ANXA2_HUMAN | ANXA2 | 38.58 | Annexin A2                                                          | No  | Yes | 7.56 |
|                           | 2 | 2  | P41222_PTGDS_HUMAN | PTGDS | 21.02 | Prostaglandin-H2 D-isomerase                                        | Yes | No  | 8.37 |
|                           | 2 | 2  | P02810_PRRPC_HUMAN | PRH1  | 24    | Salivary acidic proline-rich phosphoprotein 1/2                     | Yes | Yes | 4.14 |
| <b>Band 7 (22-25 kDa)</b> |   |    |                    |       |       |                                                                     |     |     |      |
|                           | 8 | 12 | P23284_PPIB_HUMAN  | PPIB  | 23.73 | Peptidyl-prolyl cis-trans isomerase B                               | Yes | No  | 9.25 |
|                           | 6 | 8  | P07951_TPM2_HUMAN  | TPM2  | 32.83 | Tropomyosin beta chain                                              | No  | Yes | 4.66 |
|                           | 6 | 7  | P10916_MLRV_HUMAN  | MYL2  | 18.78 | Myosin regulatory light chain 2, ventricular/cardiac muscle isoform | No  | Yes | 4.9  |
|                           | 6 | 6  | P32119_PRDX2_HUMAN | PRDX2 | 21.88 | Peroxiredoxin-2                                                     | No  | Yes | 5.67 |
|                           | 5 | 5  | P04792_HSPB1_HUMAN | HSPB1 | 22.77 | Heat shock protein beta-1                                           | No  | Yes | 5.98 |

|  |   |   |                    |          |       |                                                 |     |     |       |
|--|---|---|--------------------|----------|-------|-------------------------------------------------|-----|-----|-------|
|  | 5 | 5 | Q96DA0_ZG16B_HUMAN | ZG16B    | 22.72 | Zymogen granule protein 16 homolog B            | Yes | No  | 5.39  |
|  | 4 | 6 | P62987_RL40_HUMAN  | UBA52    | 14.72 | Ubiquitin-60S ribosomal protein L40             | No  | Yes | 10.32 |
|  | 4 | 5 | P62805_H4_HUMAN    | HIST1H4A | 11.36 | Histone H4                                      | No  | Yes | 11.36 |
|  | 4 | 4 | P08590_MYL3_HUMAN  | MYL3     | 21.92 | Myosin light chain 3                            | No  | Yes | 5.03  |
|  | 4 | 4 | P02647_APOA1_HUMAN | APOA1    | 30.76 | Apolipoprotein A-I                              | Yes | Yes | 5.56  |
|  | 4 | 4 | P31947_1433S_HUMAN | SFN      | 27.76 | 14-3-3 protein sigma                            | No  | Yes | 4.68  |
|  | 4 | 4 | P00568_KAD1_HUMAN  | AK1      | 21.62 | Adenylate kinase isoenzyme 1                    | No  | Yes | 8.73  |
|  | 3 | 8 | P12273_PIP_HUMAN   | PIP      | 16.56 | Prolactin-inducible protein                     | Yes | No  | 5.4   |
|  | 3 | 4 | P02585_TNNC2_HUMAN | TNNC2    | 18.11 | Troponin C, skeletal muscle                     | No  | No  | 4.06  |
|  | 3 | 4 | P80188_NGAL_HUMAN  | LCN2     | 22.57 | Neutrophil gelatinase-associated lipocalin      | No  | No  | 9.02  |
|  | 3 | 3 | O75223_GGCT_HUMAN  | GGCT     | 20.99 | Gamma-glutamylcyclotransferase                  | No  | Yes | 5.07  |
|  | 3 | 3 | P01036_CYTS_HUMAN  | CST4     | 16.2  | Cystatin-S                                      | No  | Yes | 4.83  |
|  | 3 | 3 | P48788_TNNI2_HUMAN | TNNI2    | 21.32 | Troponin I, fast skeletal muscle                | No  | Yes | 8.88  |
|  | 3 | 3 | P01620_KV302_HUMAN | N/A      | 11.77 | Ig kappa chain V-III region SIE                 | No  | No  | 8.7   |
|  | 3 | 3 | P25311_ZA2G_HUMAN  | AZGP1    | 34.24 | Zinc-alpha-2-glycoprotein                       | Yes | No  | 5.58  |
|  | 3 | 3 | Q06830_PRDX1_HUMAN | PRDX1    | 22.1  | Peroxiredoxin-1                                 | no  | Yes | 8.27  |
|  | 3 | 3 | P01876_IGHA1_HUMAN | IGHA1    | 37.63 | Ig alpha-1 chain C region                       | Yes | No  | 6.08  |
|  | 3 | 3 | Q13885_TBB2A_HUMAN | TUBB2A   | 49.87 | Tubulin beta-2A chain                           | No  | Yes | 4.78  |
|  | 2 | 3 | P05976_MYL1_HUMAN  | MYL1     | 21.13 | Myosin light chain 1/3, skeletal muscle isoform | No  | Yes | 4.97  |
|  | 2 | 3 | P56537_IF6_HUMAN   | EIF6     | 26.58 | Eukaryotic translation initiation factor 6      | No  | Yes | 4.56  |
|  | 2 | 2 | P68871_HBB_HUMAN   | HBB      | 15.99 | Hemoglobin subunit beta                         | Yes | Yes | 6.81  |
|  | 2 | 2 | P06753_TPM3_HUMAN  | TPM3     | 32.93 | Tropomyosin alpha-3 chain                       | No  | Yes | 4.68  |
|  | 2 | 2 | P45378_TNNT3_HUMAN | TNNT3    | 31.81 | Troponin T, fast skeletal muscle                | No  | Yes | 5.71  |
|  | 2 | 2 | P63316_TNNC1_HUMAN | TNNC1    | 18.39 | Troponin C, slow skeletal and cardiac muscles   | No  | Yes | 4.02  |
|  | 2 | 2 | P13805_TNNT1_HUMAN | TNNT1    | 32.93 | Troponin T, slow skeletal muscle                | No  | Yes | 5.86  |
|  | 2 | 2 | P01834_IGKC_HUMAN  | IGKC     | 11.6  | Ig kappa chain C region                         | No  | No  | 5.58  |
|  | 2 | 2 | P62258_1433E_HUMAN | YWHAE    | 29.16 | 14-3-3 protein beta/alpha                       | No  | Yes | 4.63  |
|  | 2 | 2 | O60911_CATL2_HUMAN | CTSV     | 37.31 | Cathepsin L2                                    | Yes | No  | 8.59  |
|  | 2 | 2 | Q99497_PARK7_HUMAN | PARK7    | 19.88 | Protein deglycase DJ-1                          | No  | Yes | 6.32  |
|  | 2 | 2 | P52566_GDIR2_HUMAN | ARHGDI2  | 22.97 | Rho GDP-dissociation inhibitor 2                | No  | Yes | 5.08  |

|                           |   |   |                     |         |        |                                            |     |     |      |
|---------------------------|---|---|---------------------|---------|--------|--------------------------------------------|-----|-----|------|
|                           | 2 | 2 | Q15828_CYTM_HUMAN   | CST6    | 16.5   | Cystatin-M                                 | Yes | No  | 7    |
|                           | 2 | 2 | P40926_MDHM_HUMAN   | MDH2    | 35.48  | Malate dehydrogenase, mitochondrial        | Yes | No  | 8.54 |
|                           | 2 | 2 | Q14116_IL18_HUMAN   | IL18    | 22.31  | Interleukin-18                             | No  | No  | 5.01 |
|                           | 2 | 2 | P11021_GRP78_HUMAN  | HSPA5   | 72.29  | 78 kDa glucose-regulated protein           | No  | Yes | 5.01 |
|                           | 2 | 2 | H3BR70_H3BR70_HUMAN | PKM     | 40.16  | Pyruvate kinase                            | No  | No  | 7.96 |
|                           | 2 | 2 | P01857_IGHG1_HUMAN  | IGHG1   | 36.08  | Ig gamma-1 chain C region                  | Yes | No  | 8.46 |
|                           | 2 | 2 | P69905_HBA_HUMAN    | HBA1    | 15.25  | Hemoglobin subunit alpha                   | Yes | Yes | 8.73 |
|                           | 2 | 2 | P31946_1433B_HUMAN  | YWHAB   | 28.06  | 14-3-3 protein beta/alpha                  | No  | Yes | 4.76 |
|                           | 2 | 2 | P20160_CAP7_HUMAN   | AZU1    | 26.87  | Azurocidin                                 | Yes | No  | 9.53 |
|                           | 2 | 2 | P05090_APOD_HUMAN   | APOD    | 21.26  | Apolipoprotein D                           | Yes | No  | 5.2  |
|                           | 2 | 2 | Q8NCW5_NNRE_HUMAN   | APOA1BP | 31.65  | NAD(P)H-hydrate epimerase                  | No  | Yes | 5.03 |
| <b>Band 8 (31 kDa)</b>    |   |   |                     |         |        |                                            |     |     |      |
|                           | 6 | 6 | Q96DR5_BPIA2_HUMAN  | BPIFA2  | 26.99  | BPI fold-containing family A member 2      | Yes | No  | 5.19 |
|                           | 4 | 5 | P62736_ACTA_HUMAN   | ACTA2   | 41.98  | Actin, aortic smooth muscle                | No  | No  | 5.24 |
|                           | 4 | 4 | Q96DA0_ZG16B_HUMAN  | ZG16B   | 22.72  | Zymogen granule protein 16 homolog B       | Yes | No  | 5.39 |
|                           | 4 | 4 | P13533_MYH6_HUMAN   | MYH6    | 223.6  | Myosin-6                                   | No  | Yes | 5.58 |
|                           | 4 | 4 | P07355_ANXA2_HUMAN  | ANXA2   | 38.58  | Annexin A2                                 | No  | Yes | 7.56 |
|                           | 3 | 4 | P52566_GDIR2_HUMAN  | ARHGDI2 | 22.97  | Rho GDP-dissociation inhibitor 2           | No  | Yes | 5.08 |
|                           | 2 | 3 | Q15517_CDSN_HUMAN   | CDSN    | 51.49  | Corneodesmosin                             | Yes | No  | 8.48 |
|                           | 2 | 3 | P31946_1433B_HUMAN  | YWHAB   | 28.06  | 14-3-3 protein beta/alpha                  | No  | Yes | 4.76 |
|                           | 2 | 2 | P80188_NGAL_HUMAN   | LCN2    | 22.57  | Neutrophil gelatinase-associated lipocalin | No  | No  | 9.02 |
|                           | 2 | 2 | P04406_G3P_HUMAN    | GAPDH   | 36.03  | Glyceraldehyde-3-phosphate dehydrogenase   | No  | Yes | 8.58 |
|                           | 2 | 2 | P60709_ACTB_HUMAN   | ACTB    | 41.71  | Actin, cytoplasmic 1                       | No  | No  | 5.29 |
|                           | 2 | 2 | O00299_CLIC1_HUMAN  | CLIC1   | 26.91  | Chloride intracellular channel protein 1   | No  | Yes | 5.09 |
|                           | 2 | 2 | P20160_CAP7_HUMAN   | AZU1    | 26.87  | Azurocidin                                 | Yes | No  | 9.53 |
|                           | 2 | 2 | P01857_IGHG1_HUMAN  | IGHG1   | 36.08  | Ig gamma-1 chain C region                  | Yes | No  | 8.46 |
|                           | 2 | 2 | P05090_APOD_HUMAN   | APOD    | 21.26  | Apolipoprotein D                           | Yes | No  | 5.2  |
| <b>Band 9 (49-51 kDa)</b> |   |   |                     |         |        |                                            |     |     |      |
|                           | 5 | 7 | P62736_ACTA_HUMAN   | ACTA2   | 41.98  | Actin, aortic smooth muscle                | No  | No  | 5.24 |
|                           | 5 | 5 | Q9UKX3_MYH13_HUMAN  | MYH13   | 223.47 | Myosin-13                                  | No  | No  | 5.53 |

|                         |    |    |                     |          |        |                                          |     |     |       |
|-------------------------|----|----|---------------------|----------|--------|------------------------------------------|-----|-----|-------|
|                         | 4  | 5  | P25311_ZA2G_HUMAN   | AZGP1    | 34.24  | Zinc-alpha-2-glycoprotein                | Yes | No  | 5.58  |
|                         | 4  | 4  | P07355_ANXA2_HUMAN  | ANXA2    | 38.58  | Annexin A2                               | No  | Yes | 7.56  |
|                         | 3  | 3  | P04040_CATA_HUMAN   | CAT      | 59.72  | Catalase                                 | No  | Yes | 6.9   |
|                         | 3  | 3  | P12273_PIP_HUMAN    | PIP      | 16.56  | Prolactin-inducible protein              | Yes | No  | 5.4   |
|                         | 2  | 2  | P30740_ILEU_HUMAN   | SERPINB1 | 42.71  | Leukocyte elastase inhibitor             | No  | No  | 5.9   |
|                         | 2  | 2  | Q96DA0_ZG16B_HUMAN  | ZG16B    | 22.72  | Zymogen granule protein 16 homolog B     | Yes | No  | 5.39  |
|                         | 2  | 2  | P12882_MYH1_HUMAN   | MYH1     | 223.01 | Myosin-1                                 | No  | Yes | 5.58  |
|                         | 2  | 2  | P62987_RL40_HUMAN   | UBA52    | 14.72  | Ubiquitin-60S ribosomal protein L40      | No  | Yes | 10.32 |
|                         | 2  | 2  | P01876_IGHA1_HUMAN  | IGHA1    | 37.63  | Ig alpha-1 chain C region                | Yes | No  | 6.08  |
|                         | 2  | 2  | P04406_G3P_HUMAN    | GAPDH    | 36.03  | Glyceraldehyde-3-phosphate dehydrogenase | No  | Yes | 8.58  |
|                         | 2  | 2  | Q15517_CDSN_HUMAN   | CDSN     | 51.49  | Corneodesmosin                           | Yes | No  | 8.48  |
|                         | 2  | 2  | P23280_CAH6_HUMAN   | CA6      | 35.34  | Carbonic anhydrase 6                     | Yes | No  | 6.41  |
|                         | 2  | 2  | Q06830_PRDX1_HUMAN  | PRDX1    | 22.1   | Peroxiredoxin-1                          | no  | Yes | 8.27  |
|                         | 2  | 2  | P01857_IGHG1_HUMAN  | IGHG1    | 36.08  | Ig gamma-1 chain C region                | Yes | No  | 8.46  |
|                         | 2  | 2  | P14618_KPYM_HUMAN   | PKM      | 57.9   | Pyruvate kinase                          | No  | No  | 7.96  |
| <b>Band 10 (60 kDa)</b> |    |    |                     |          |        |                                          |     |     |       |
|                         | 11 | 19 | AMY1_HUMAN          | AMY1A    | 57.73  | Alpha-amylase 1                          | Yes | Nos | 6.34  |
|                         | 4  | 4  | P07355_ANXA2_HUMAN  | ANXA2    | 38.58  | Annexin A2                               | No  | Yes | 7.56  |
|                         | 4  | 4  | P68104_EEF1A1_HUMAN | EEF1A1   | 50.11  | Elongation factor 1-alpha 1              | No  | Yes | 9.1   |
|                         | 4  | 4  | P01876_IGHA1_HUMAN  | IGHA1    | 37.63  | Ig alpha-1 chain C region                | Yes | No  | 6.08  |
|                         | 3  | 3  | P05164_PERM_HUMAN   | MPO      | 83.81  | Myeloperoxidase                          | Yes | No  | 9.22  |
|                         | 3  | 3  | Q06830_PRDX1_HUMAN  | PRDX1    | 22.1   | Peroxiredoxin-1                          | no  | Yes | 8.27  |
|                         | 2  | 2  | P04040_CATA_HUMAN   | CAT      | 59.72  | Catalase                                 | No  | Yes | 6.9   |
|                         | 2  | 2  | P14618_KPYM_HUMAN   | PKM      | 57.9   | Pyruvate kinase                          | No  | No  | 7.96  |
|                         | 2  | 2  | P02788_TRFL_HUMAN   | LTF      | 78.13  | Lactotransferrin                         | Yes | Yes | 8.47  |
|                         | 2  | 2  | P32119_PRDX2_HUMAN  | PRDX2    | 21.88  | Peroxiredoxin-2                          | No  | Yes | 5.67  |
| <b>Band 11 (63 kDa)</b> |    |    |                     |          |        |                                          |     |     |       |
|                         | 9  | 27 | AMY1_HUMAN          | AMY1A    | 57.73  | Alpha-amylase 1                          | Yes | Nos | 6.34  |
|                         | 7  | 8  | P01876_IGHA1_HUMAN  | IGHA1    | 37.63  | Ig alpha-1 chain C region                | Yes | No  | 6.08  |
|                         | 5  | 5  | P07237_PDIA1_HUMAN  | P4HB     | 57.08  | Protein disulfide-isomerase              | No  | Yes | 4.69  |
|                         | 5  | 5  | P05164_PERM_HUMAN   | MPO      | 83.81  | Myeloperoxidase                          | Yes | No  | 9.22  |

|                             |    |    |                    |          |       |                                     |     |     |       |
|-----------------------------|----|----|--------------------|----------|-------|-------------------------------------|-----|-----|-------|
|                             | 3  | 3  | P62736_ACTA_HUMAN  | ACTA2    | 41.98 | Actin, aortic smooth muscle         | No  | No  | 5.24  |
|                             | 2  | 3  | O75223_GGCT_HUMAN  | GGCT     | 20.99 | Gamma-glutamylcyclotransferase      | No  | Yes | 5.07  |
|                             | 2  | 2  | P62987_RL40_HUMAN  | UBA52    | 14.72 | Ubiquitin-60S ribosomal protein L40 | No  | Yes | 10.32 |
|                             | 2  | 2  | P41222_PTGDS_HUMAN | PTGDS    | 21.02 | Prostaglandin-H2 D-isomerase        | Yes | No  | 8.37  |
|                             | 2  | 2  | P07355_ANXA2_HUMAN | ANXA2    | 38.58 | Annexin A2                          | No  | Yes | 7.56  |
|                             | 2  | 2  | P01011_AACT_HUMAN  | SERPINA3 | 47.62 | Alpha-1-antichymotrypsin            | Yes | No  | 5.32  |
|                             | 2  | 2  | P01019_ANGT_HUMAN  | AGT      | 53.12 | Angiotensinogen                     | Yes | No  | 5.6   |
|                             | 2  | 2  | P04040_CATA_HUMAN  | CAT      | 59.72 | Catalase                            | No  | Yes | 6.9   |
|                             | 2  | 2  | P32119_PRDX2_HUMAN | PRDX2    | 21.88 | Peroxiredoxin-2                     | No  | Yes | 5.67  |
|                             | 2  | 2  | Q06830_PRDX1_HUMAN | PRDX1    | 22.1  | Peroxiredoxin-1                     | No  | Yes | 8.27  |
|                             | 2  | 2  | P07384_CAN1_HUMAN  | CAPN1    | 81.84 | Calpain-1 catalytic subunit         | No  | No  | 5.49  |
| <b>Band 12 (71 kDa)</b>     |    |    |                    |          |       |                                     |     |     |       |
|                             | 23 | 38 | ALBU_HUMAN         | ALB      | 69.32 | Serum albumin                       | Yes | Yes | 5.67  |
|                             | 6  | 6  | P01876_IGHA1_HUMAN | IGHA1    | 37.63 | Ig alpha-1 chain C region           | Yes | No  | 6.08  |
|                             | 3  | 3  | P62736_ACTA_HUMAN  | ACTA2    | 41.98 | Actin, aortic smooth muscle         | No  | No  | 5.24  |
|                             | 3  | 3  | P07355_ANXA2_HUMAN | ANXA2    | 38.58 | Annexin A2                          | No  | Yes | 7.56  |
|                             | 2  | 3  | P25311_ZA2G_HUMAN  | AZGP1    | 34.24 | Zinc-alpha-2-glycoprotein           | Yes | No  | 5.58  |
|                             | 2  | 2  | P62805_H4_HUMAN    | HIST1H4A | 11.36 | Histone H4                          | No  | Yes | 11.36 |
|                             | 2  | 2  | P60709_ACTB_HUMAN  | ACTB     | 41.71 | Actin, cytoplasmic 1                | No  | No  | 5.29  |
|                             | 2  | 2  | P13796_PLSL_HUMAN  | LCP1     | 70.24 | Plastin-2                           | No  | Yes | 5.29  |
|                             | 2  | 2  | P14618_KPYM_HUMAN  | PKM      | 57.9  | Pyruvate kinase                     | No  | No  | 7.96  |
|                             | 2  | 2  | Q06830_PRDX1_HUMAN | PRDX1    | 22.1  | Peroxiredoxin-1                     | no  | Yes | 8.27  |
| <b>Band 13 (75-100 kDa)</b> |    |    |                    |          |       |                                     |     |     |       |
|                             | 10 | 10 | P02788_TRFL_HUMAN  | LTF      | 78.13 | Lactotransferrin                    | Yes | Yes | 8.47  |
|                             | 6  | 6  | P11021_GRP78_HUMAN | HSPA5    | 72.29 | 78 kDa glucose-regulated protein    | No  | Yes | 5.01  |
|                             | 4  | 4  | P07355_ANXA2_HUMAN | ANXA2    | 38.58 | Annexin A2                          | No  | Yes | 7.56  |
|                             | 3  | 4  | P02787_TRFE_HUMAN  | TF       | 77.01 | Serotransferrin                     | Yes | Yes | 6.7   |
|                             | 3  | 3  | P62736_ACTA_HUMAN  | ACTA2    | 41.98 | Actin, aortic smooth muscle         | No  | No  | 5.24  |
|                             | 3  | 3  | P13667_PDIA4_HUMAN | PDIA4    | 72.89 | Protein disulfide-isomerase A4      | No  | No  | 4.89  |
|                             | 3  | 3  | P04040_CATA_HUMAN  | CAT      | 59.72 | Catalase                            | No  | Yes | 6.9   |
|                             | 3  | 3  | Q15517_CDSN_HUMAN  | CDSN     | 51.49 | Corneodesmosin                      | Yes | No  | 8.48  |

|                           |   |   |                    |       |       |                                     |     |     |       |
|---------------------------|---|---|--------------------|-------|-------|-------------------------------------|-----|-----|-------|
|                           | 2 | 2 | P60709_ACTB_HUMAN  | ACTB  | 41.71 | Actin, cytoplasmic 1                | No  | No  | 5.29  |
|                           | 2 | 2 | Q06830_PRDX1_HUMAN | PRDX1 | 22.1  | Peroxiredoxin-1                     | no  | Yes | 8.27  |
|                           | 2 | 2 | P62987_RL40_HUMAN  | UBA52 | 14.72 | Ubiquitin-60S ribosomal protein L40 | No  | Yes | 10.32 |
|                           | 2 | 2 | P01871_IGHM_HUMAN  | IGHM  | 49.28 | Ig mu chain C region                | Yes | No  | 6.35  |
|                           | 2 | 2 | P01857_IGHG1_HUMAN | IGHG1 | 36.08 | Ig gamma-1 chain C region           | Yes | No  | 8.46  |
|                           | 2 | 2 | P22079_PERL_HUMAN  | LPO   | 80.24 | Lactoperoxidase                     | Yes | Yes | 8.22  |
| <b>Band 14 (100+ kDa)</b> |   |   |                    |       |       |                                     |     |     |       |
|                           | 3 | 3 | P32119_PRDX2_HUMAN | PRDX2 | 21.88 | Peroxiredoxin-2                     | No  | Yes | 5.67  |
|                           |   |   |                    |       |       |                                     |     |     |       |

**Appendix Table 1B. Serum proteins adsorbed to hydroxyapatite identified in stained protein bands.**

|                           | Unique peptides | Total peptides | Reference          | Gene Symbol | MW (kDa) | Name                        | Glycosylated | Phosphorylated | Theoretical pI |
|---------------------------|-----------------|----------------|--------------------|-------------|----------|-----------------------------|--------------|----------------|----------------|
| <b>Band A (9.9 kDa)</b>   |                 |                |                    |             |          |                             |              |                |                |
|                           | 5               | 5              | P02652_APOA2_HUMAN | APOA2       | 11.17    | Apolipoprotein A-II         | Yes          | Yes            | 5.05           |
|                           | 3               | 3              | P62805_H4_HUMAN    | HIST1H4A    | 11.36    | Histone H4                  | No           | Yes            | 6.92           |
|                           | 2               | 3              | P25311_ZA2G_HUMAN  | AZGP1       | 34.24    | Zinc-alpha-2-glycoprotein   | Yes          | No             | 5.58           |
|                           | 2               | 2              | P02656_APOC3_HUMAN | APOC3       | 10.85    | Apolipoprotein C-III        | Yes          | No             | 4.72           |
|                           | 2               | 2              | Q15517_CDSN_HUMAN  | CDSN        | 51.49    | Corneodesmosin              | Yes          | No             | 8.48           |
|                           | 2               | 2              | P62736_ACTA_HUMAN  | ACTA2       | 41.98    | Actin, aortic smooth muscle | No           | No             | 5.24           |
|                           | 2               | 2              | P07355_ANXA2_HUMAN | ANXA2       | 38.58    | Annexin A2                  | No           | Yes            | 7.56           |
|                           | 2               | 2              | P04004_VTNC_HUMAN  | VTN         | 54.27    | Vitronectin                 | Yes          | Yes            | 5.47           |
| <b>Band B (10-15 kDa)</b> |                 |                |                    |             |          |                             |              |                |                |
|                           | 4               | 5              | P01876_IGHA1_HUMAN | IGHA1       | 37.63    | Ig alpha-1 chain C region   | Yes          | No             | 6.08           |
|                           | 4               | 4              | P07355_ANXA2_HUMAN | ANXA2       | 38.58    | Annexin A2                  | No           | Yes            | 7.56           |
|                           | 3               | 4              | P62805_H4_HUMAN    | HIST1H4A    | 11.36    | Histone H4                  | No           | Yes            | 6.92           |
|                           | 3               | 3              | Q06830_PRDX1_HUMAN | PRDX1       | 22.1     | Peroxiredoxin-1             | No           | Yes            | 8.27           |
|                           | 2               | 3              | P02656_APOC3_HUMAN | APOC3       | 10.85    | Apolipoprotein C-III        | Yes          | No             | 4.72           |
|                           | 2               | 2              | P62736_ACTA_HUMAN  | ACTA2       | 41.98    | Actin, aortic smooth muscle | No           | No             | 5.24           |
|                           | 2               | 2              | P04040_CATA_HUMAN  | CAT         | 59.72    | Catalase                    | No           | Yes            | 6.9            |

|                        |    |    |                    |          |        |                                          |     |     |      |
|------------------------|----|----|--------------------|----------|--------|------------------------------------------|-----|-----|------|
|                        | 2  | 2  | P68104_EF1A1_HUMAN | EEF1A1   | 50.11  | Elongation factor 1-alpha 1              | No  | Yes | 9.1  |
|                        | 2  | 2  | Q15517_CDSN_HUMAN  | CDSN     | 51.49  | Corneodesmosin                           | Yes | No  | 8.48 |
|                        | 2  | 2  | P00739_HPTR_HUMAN  | HPR      | 39     | Haptoglobin-related protein              | No  | No  | 6.63 |
| <b>Band C (17 kDa)</b> |    |    |                    |          |        |                                          |     |     |      |
|                        | 3  | 3  | P62805_H4_HUMAN    | HIST1H4A | 11.36  | Histone H4                               | No  | Yes | 6.92 |
|                        | 2  | 3  | P62736_ACTA_HUMAN  | ACTA2    | 41.98  | Actin, aortic smooth muscle              | No  | No  | 5.24 |
|                        | 2  | 3  | P25311_ZA2G_HUMAN  | AZGP1    | 34.24  | Zinc-alpha-2-glycoprotein                | Yes | No  | 5.58 |
|                        | 2  | 2  | P07355_ANXA2_HUMAN | ANXA2    | 38.58  | Annexin A2                               | No  | Yes | 7.56 |
|                        | 2  | 2  | P04040_CATA_HUMAN  | CAT      | 59.72  | Catalase                                 | No  | Yes | 6.9  |
|                        | 2  | 2  | P06727_APOA4_HUMAN | APOA4    | 45.37  | Apolipoprotein A-IV                      | No  | Yes | 5.28 |
|                        | 2  | 2  | Q06830_PRDX1_HUMAN | PRDX1    | 22.1   | Peroxiredoxin-1                          | No  | Yes | 8.27 |
|                        | 2  | 2  | P01876_IGHA1_HUMAN | IGHA1    | 37.63  | Ig alpha-1 chain C region                | Yes | No  | 6.08 |
| <b>Band D (26 kDa)</b> |    |    |                    |          |        |                                          |     |     |      |
|                        | 13 | 14 | P02647_APOA1_HUMAN | APOA1    | 30.76  | Apolipoprotein A-I                       | Yes | Yes | 5.56 |
|                        | 5  | 5  | P02649_APOE_HUMAN  | APOE     | 36.13  | Apolipoprotein E                         | Yes | Yes | 5.65 |
|                        | 2  | 2  | P25311_ZA2G_HUMAN  | AZGP1    | 34.24  | Zinc-alpha-2-glycoprotein                | Yes | No  | 5.58 |
|                        | 2  | 2  | P0CG05_LAC2_HUMAN  | IGLC2    | 11.29  | Ig lambda-2 chain C regions              | No  | No  | 6.91 |
|                        | 2  | 2  | P02753_RET4_HUMAN  | RBP4     | 23     | Retinol-binding protein 4                | No  | No  | 5.76 |
|                        | 2  | 2  | P02741_CRP_HUMAN   | CRP      | 25.02  | C-reactive protein                       | No  | No  | 5.28 |
| <b>Band E (28 kDa)</b> |    |    |                    |          |        |                                          |     |     |      |
|                        | 6  | 8  | P02647_APOA1_HUMAN | APOA1    | 30.76  | Apolipoprotein A-I                       | Yes | Yes | 5.56 |
|                        | 3  | 11 | P01620_KV302_HUMAN | N/A      | 11.77  | Ig kappa chain V-III region SIE          | No  | No  | 8.7  |
|                        | 3  | 8  | P0CG05_LAC2_HUMAN  | IGLC2    | 11.29  | Ig lambda-2 chain C regions              | No  | No  | 6.91 |
|                        | 3  | 5  | P01834_IGKC_HUMAN  | IGKC     | 11.6   | Ig kappa chain C region                  | No  | No  | 5.58 |
|                        | 3  | 4  | P05090_APOD_HUMAN  | APOD     | 21.26  | Apolipoprotein D                         | Yes | No  | 5.2  |
|                        | 3  | 3  | P02649_APOE_HUMAN  | APOE     | 36.13  | Apolipoprotein E                         | Yes | Yes | 5.65 |
|                        | 3  | 3  | P01024_CO3_HUMAN   | C3       | 187.03 | Complement C3                            | Yes | Yes | 6.02 |
|                        | 2  | 5  | P04433_KV309_HUMAN | N/A      | 12.57  | Ig kappa chain V-III region VG           | No  | No  | 4.85 |
|                        | 2  | 3  | B9A064_IGLL5_HUMAN | IGLL5    | 23.05  | Immunoglobulin lambda-like polypeptide 5 | No  | No  | 9.08 |
|                        | 2  | 2  | P80748_LV302_HUMAN | N/A      | 11.93  | Ig lambda chain V-III region LOI         | No  | No  | 5.24 |
|                        | 2  | 2  | P62736_ACTA_HUMAN  | ACTA2    | 41.98  | Actin, aortic smooth muscle              | No  | No  | 5.24 |



|                        |    |    |                             |          |        |                                       |     |     |      |
|------------------------|----|----|-----------------------------|----------|--------|---------------------------------------|-----|-----|------|
|                        | 2  | 2  | P07355_ANXA2_HUMAN          | ANXA2    | 38.58  | Annexin A2                            | No  | Yes | 7.56 |
|                        | 2  | 2  | A0A075B6I0_A0A075B6I0_HUMAN | IGLV8-61 | 12.81  | Protein IGLV8-61                      | No  | No  | 4.33 |
|                        | 2  | 2  | Q15517_CDSN_HUMAN           | CDSN     | 51.49  | Corneodesmosin                        | Yes | No  | 8.48 |
| <b>Band F (42 kDa)</b> |    |    |                             |          |        |                                       |     |     |      |
|                        | 7  | 7  | P01024_CO3_HUMAN            | C3       | 187.03 | Complement C3                         | Yes | Yes | 6.02 |
|                        | 5  | 5  | P07355_ANXA2_HUMAN          | ANXA2    | 38.58  | Annexin A2                            | No  | Yes | 7.56 |
|                        | 5  | 5  | P62736_ACTA_HUMAN           | ACTA2    | 41.98  | Actin, aortic smooth muscle           | No  | No  | 5.24 |
|                        | 5  | 5  | P58107_EPIPL_HUMAN          | EPPK1    | 555.28 | Epiplakin                             | No  | Yes | 5.44 |
|                        | 4  | 4  | P06727_APOA4_HUMAN          | APOA4    | 45.37  | Apolipoprotein A-IV                   | No  | Yes | 5.28 |
|                        | 4  | 4  | P14618_KPYM_HUMAN           | PKM      | 57.9   | Pyruvate kinase PKM                   | No  | Yes | 7.96 |
|                        | 3  | 3  | P11142_HSP7C_HUMAN          | HSPA8    | 70.85  | Heat shock cognate 71 kDa protein     | No  | Yes | 5.37 |
|                        | 3  | 3  | P10909_CLUS_HUMAN           | CLU      | 52.46  | Clusterin                             | Yes | Yes | 5.89 |
|                        | 3  | 3  | P05090_APOD_HUMAN           | APOD     | 21.26  | Apolipoprotein D                      | Yes | No  | 5.2  |
|                        | 2  | 3  | P05120_PA12_HUMAN           | SERPINB2 | 46.57  | Plasminogen activator inhibitor 2     | Yes | No  | 5.46 |
|                        | 2  | 2  | P02649_APOE_HUMAN           | APOE     | 36.13  | Apolipoprotein E                      | Yes | Yes | 5.65 |
|                        | 2  | 2  | P60709_ACTB_HUMAN           | ACTB     | 41.71  | Actin, cytoplasmic 1                  | No  | No  | 5.29 |
|                        | 2  | 2  | P01834_IGKC_HUMAN           | IGKC     | 11.6   | Ig kappa chain C region               | No  | No  | 5.58 |
|                        | 2  | 2  | Q15517_CDSN_HUMAN           | CDSN     | 51.49  | Corneodesmosin                        | Yes | No  | 8.48 |
|                        | 2  | 2  | P02545_LMNA_HUMAN           | LMNA     | 74.09  | Prelamin-A/C                          | No  | Yes | 6.57 |
|                        | 2  | 2  | P25311_ZA2G_HUMAN           | AZGP1    | 34.24  | Zinc-alpha-2-glycoprotein             | Yes | No  | 5.58 |
|                        | 2  | 2  | Q01469_FABP5_HUMAN          | FABP5    | 15.15  | Fatty acid-binding protein, epidermal | No  | Yes | 6.82 |
|                        | 2  | 2  | Q06830_PRDX1_HUMAN          | PRDX1    | 22.1   | Peroxiredoxin-1                       | No  | Yes | 8.27 |
|                        | 2  | 2  | P01857_IGHG1_HUMAN          | IGHG1    | 36.08  | Ig gamma-1 chain C region             | Yes | No  | 8.46 |
|                        | 2  | 2  | P06733_ENOA_HUMAN           | ENO1     | 47.14  | Alpha-enolase                         | No  | Yes | 6.99 |
| <b>Band G (37 kDa)</b> |    |    |                             |          |        |                                       |     |     |      |
|                        | 26 | 29 | P06727_APOA4_HUMAN          | APOA4    | 45.37  | Apolipoprotein A-IV                   | No  | Yes | 5.28 |
|                        | 7  | 8  | P36955_PEDF_HUMAN           | SERPINF1 | 46.28  | Pigment epithelium-derived factor     | No  | Yes | 5.9  |
|                        | 5  | 5  | P01024_CO3_HUMAN            | C3       | 187.03 | Complement C3                         | Yes | Yes | 6.02 |
|                        | 4  | 5  | P25311_ZA2G_HUMAN           | AZGP1    | 34.24  | Zinc-alpha-2-glycoprotein             | Yes | No  | 5.58 |
|                        | 2  | 3  | P62736_ACTA_HUMAN           | ACTA2    | 41.98  | Actin, aortic smooth muscle           | No  | No  | 5.24 |
|                        | 2  | 2  | P00738_HPT_HUMAN            | HP       | 45.18  | Haptoglobin                           | Yes | No  | 6.13 |

|                           |   |    |                     |          |        |                                                     |     |     |      |
|---------------------------|---|----|---------------------|----------|--------|-----------------------------------------------------|-----|-----|------|
|                           | 2 | 2  | P01876_IGHA1_HUMAN  | IGHA1    | 37.63  | Ig alpha-1 chain C region                           | Yes | No  | 6.08 |
|                           | 2 | 2  | P62805_H4_HUMAN     | HIST1H4A | 11.36  | Histone H4                                          | No  | Yes | 6.92 |
|                           | 2 | 2  | P01834_IGKC_HUMAN   | IGKC     | 11.6   | Ig kappa chain C region                             | No  | No  | 5.58 |
|                           | 2 | 2  | P00739_HPTR_HUMAN   | HPR      | 39     | Haptoglobin-related protein                         | No  | No  | 6.63 |
|                           | 2 | 2  | P07355_ANXA2_HUMAN  | ANXA2    | 38.58  | Annexin A2                                          | No  | Yes | 7.56 |
|                           | 2 | 2  | P0C0L4_CO4A_HUMAN   | C4A      | 192.66 | Complement C4-A                                     | Yes | Yes | 8.69 |
| <b>Band H (57-60 kDa)</b> |   |    |                     |          |        |                                                     |     |     |      |
|                           | 6 | 13 | P01857_IGHG1_HUMAN  | IGHG1    | 36.08  | Ig gamma-1 chain C region                           | Yes | No  | 8.46 |
|                           | 5 | 5  | P02774_VTDB_HUMAN   | GC       | 52.93  | Vitamin D-binding protein                           | Yes | No  | 5.22 |
|                           | 5 | 5  | P07355_ANXA2_HUMAN  | ANXA2    | 38.58  | Annexin A2                                          | No  | Yes | 7.56 |
|                           | 4 | 4  | P02750_A2GL_HUMAN   | LRG1     | 38.15  | Leucine-rich alpha-2-glycoprotein                   | Yes | No  | 5.66 |
|                           | 3 | 3  | P04083_ANXA1_HUMAN  | ANXA1    | 38.69  | Annexin A1                                          | No  | Yes | 6.64 |
|                           | 3 | 3  | Q15517_CDSN_HUMAN   | CDSN     | 51.49  | Corneodesmosin                                      | Yes | No  | 8.48 |
|                           | 3 | 3  | P62736_ACTA_HUMAN   | ACTA2    | 41.98  | Actin, aortic smooth muscle                         | No  | No  | 5.24 |
|                           | 2 | 3  | D6RF35_D6RF35_HUMAN | GC       | 52.99  | Vitamin D-binding protein                           | Yes | No  | 5.22 |
|                           | 2 | 2  | P01009_A1AT_HUMAN   | SERPINA1 | 46.71  | Alpha-1-antitrypsin                                 | Yes | Yes | 5.37 |
|                           | 2 | 2  | P14618_KPYM_HUMAN   | PKM      | 57.9   | Pyruvate kinase PKM                                 | No  | Yes | 7.96 |
|                           | 2 | 2  | P01008_ANT3_HUMAN   | SERPINC1 | 52.57  | Antithrombin-III                                    | Yes | Yes | 5.95 |
|                           | 2 | 2  | P62805_H4_HUMAN     | HIST1H4A | 11.36  | Histone H4                                          | No  | Yes | 6.92 |
|                           | 2 | 2  | Q06830_PRDX1_HUMAN  | PRDX1    | 22.1   | Peroxiredoxin-1                                     | No  | Yes | 8.27 |
|                           | 2 | 2  | P00338_LDHA_HUMAN   | LDHA     | 36.67  | L-lactate dehydrogenase A chain                     | No  | Yes | 8.46 |
|                           | 2 | 2  | Q09666_AHNK_HUMAN   | AHNAK    | 628.7  | Neuroblast differentiation-associated protein AHNAK | No  | Yes | 5.8  |
| <b>Band I (64 kDa)</b>    |   |    |                     |          |        |                                                     |     |     |      |
|                           | 8 | 15 | P01857_IGHG1_HUMAN  | IGHG1    | 36.08  | Ig gamma-1 chain C region                           | Yes | No  | 8.46 |
|                           | 7 | 11 | P01009_A1AT_HUMAN   | SERPINA1 | 46.71  | Alpha-1-antitrypsin                                 | Yes | Yes | 5.37 |
|                           | 7 | 7  | P01008_ANT3_HUMAN   | SERPINC1 | 52.57  | Antithrombin-III                                    | Yes | Yes | 5.95 |
|                           | 6 | 6  | P01042_KNG1_HUMAN   | KNG1     | 71.91  | Kininogen-1                                         | Yes | Yes | 6.23 |
|                           | 3 | 3  | P01011_AACT_HUMAN   | SERPINA3 | 47.62  | Alpha-1-antichymotrypsin                            | Yes | No  | 5.32 |
|                           | 3 | 3  | P07355_ANXA2_HUMAN  | ANXA2    | 38.58  | Annexin A2                                          | No  | Yes | 7.56 |
|                           | 3 | 3  | P02774_VTDB_HUMAN   | GC       | 52.93  | Vitamin D-binding protein                           | Yes | No  | 5.22 |
|                           | 2 | 2  | P04040_CATA_HUMAN   | CAT      | 59.72  | Catalase                                            | No  | Yes | 6.9  |

|                        |    |     |                    |           |        |                                        |     |     |      |
|------------------------|----|-----|--------------------|-----------|--------|----------------------------------------|-----|-----|------|
|                        | 2  | 2   | P01859_IGHG2_HUMAN | IGHG2     | 35.88  | Ig gamma-2 chain C region              | Yes | No  | 7.66 |
|                        | 2  | 2   | P01019_ANGT_HUMAN  | AGT       | 53.12  | Angiotensinogen                        | Yes | No  | 5.6  |
|                        | 2  | 2   | Q8WVV4_POF1B_HUMAN | POF1B     | 68.02  | Protein POF1B                          | No  | No  | 5.89 |
|                        | 2  | 2   | P29622_KAIN_HUMAN  | SERPINA4  | 48.51  | Kallistatin                            | Yes | No  | 7.88 |
| <b>Band J (68 kDa)</b> |    |     |                    |           |        |                                        |     |     |      |
|                        | 42 | 205 | ALBU_HUMAN         | ALB       | 69.32  | Serum albumin                          | Yes | Yes | 5.67 |
|                        | 25 | 38  | P01024_CO3_HUMAN   | C3        | 187.03 | Complement C3                          | Yes | Yes | 6.02 |
|                        | 7  | 8   | P01876_IGHA1_HUMAN | IGHA1     | 37.63  | Ig alpha-1 chain C region              | Yes | No  | 6.08 |
|                        | 7  | 7   | P01011_AACT_HUMAN  | SERPINA3  | 47.62  | Alpha-1-antichymotrypsin               | Yes | No  | 5.32 |
|                        | 6  | 6   | P01042_KNG1_HUMAN  | KNG1      | 71.91  | Kininogen-1                            | Yes | Yes | 6.23 |
|                        | 4  | 4   | P01009_A1AT_HUMAN  | SERPINA1  | 46.71  | Alpha-1-antitrypsin                    | Yes | Yes | 5.37 |
|                        | 3  | 5   | P04004_VTNC_HUMAN  | VTN       | 54.27  | Vitronectin                            | Yes | Yes | 5.47 |
|                        | 3  | 4   | Q9UK55_ZPI_HUMAN   | SERPINA10 | 50.67  | Protein Z-dependent protease inhibitor | Yes | Yes | 7.86 |
|                        | 3  | 3   | P07357_CO8A_HUMAN  | C8A       | 65.12  | Complement component C8 alpha chain    | Yes | No  | 5.74 |
|                        | 3  | 3   | P05546_HEP2_HUMAN  | SERPIND1  | 57.03  | Heparin cofactor 2                     | Yes | Yes | 6.26 |
|                        | 3  | 3   | P00751_CFB_HUMAN   | CFB       | 85.48  | Complement factor B                    | Yes | Yes | 6.66 |
|                        | 3  | 3   | P01019_ANGT_HUMAN  | AGT       | 53.12  | Angiotensinogen                        | Yes | No  | 5.6  |
|                        | 3  | 3   | P01008_ANT3_HUMAN  | SERPINC1  | 52.57  | Antithrombin-III                       | Yes | Yes | 5.95 |
|                        | 2  | 3   | P02790_HEMO_HUMAN  | HPX       | 51.64  | Hemopexin                              | Yes | No  | 6.43 |
|                        | 2  | 3   | P01857_IGHG1_HUMAN | IGHG1     | 36.08  | Ig gamma-1 chain C region              | Yes | No  | 8.46 |
|                        | 2  | 2   | P04217_A1BG_HUMAN  | A1BG      | 54.22  | Alpha-1B-glycoprotein                  | Yes | No  | 5.63 |
|                        | 2  | 2   | P08697_A2AP_HUMAN  | SERPINF2  | 54.53  | Alpha-2-antiplasmin                    | Yes | No  | 5.87 |
|                        | 2  | 2   | P02748_CO9_HUMAN   | C9        | 63.13  | Complement component C9                | Yes | Yes | 5.42 |
| <b>Band K (80 kDa)</b> |    |     |                    |           |        |                                        |     |     |      |
|                        | 22 | 28  | ALBU_HUMAN         | ALB       | 69.32  | Serum albumin                          | Yes | Yes | 5.67 |
|                        | 12 | 17  | P02787_TRFE_HUMAN  | TF        | 77.01  | Serotransferrin                        | Yes | Yes | 6.7  |
|                        | 5  | 5   | P0C0L4_CO4A_HUMAN  | C4A       | 192.66 | Complement C4-A                        | Yes | Yes | 8.69 |
|                        | 5  | 5   | P01024_CO3_HUMAN   | C3        | 187.03 | Complement C3                          | Yes | Yes | 6.02 |
|                        | 4  | 4   | P07355_ANXA2_HUMAN | ANXA2     | 38.58  | Annexin A2                             | No  | Yes | 7.56 |
|                        | 4  | 4   | P01871_IGHM_HUMAN  | IGHM      | 49.28  | Ig mu chain C region                   | Yes | No  | 6.35 |
|                        | 4  | 4   | Q06830_PSDX1_HUMAN | PRDX1     | 22.1   | Peroxiredoxin-1                        | No  | Yes | 8.27 |

|                        |    |    |                    |          |        |                                                                        |     |     |       |
|------------------------|----|----|--------------------|----------|--------|------------------------------------------------------------------------|-----|-----|-------|
|                        | 3  | 4  | P19827_ITIH1_HUMAN | ITIH1    | 101.33 | Inter-alpha-trypsin inhibitor heavy chain H1                           | Yes | Yes | 6.33  |
|                        | 3  | 3  | P04040_CATA_HUMAN  | CAT      | 59.72  | Catalase                                                               | No  | Yes | 6.9   |
|                        | 3  | 3  | P11021_GRP78_HUMAN | HSPA5    | 72.29  | 78 kDa glucose-regulated protein                                       | No  | Yes | 5.01  |
|                        | 3  | 3  | P14618_KPYM_HUMAN  | PKM      | 57.9   | Pyruvate kinase PKM                                                    | No  | Yes | 7.96  |
|                        | 3  | 3  | P62736_ACTA_HUMAN  | ACTA2    | 41.98  | Actin, aortic smooth muscle                                            | No  | No  | 5.24  |
|                        | 3  | 3  | P35858_ALS_HUMAN   | IGFALS   | 65.99  | Insulin-like growth factor-binding protein complex acid labile subunit | Yes | No  | 6.13  |
|                        | 2  | 3  | P0CG05_LAC2_HUMAN  | IGLC2    | 11.29  | Ig lambda-2 chain C regions                                            | No  | No  | 6.91  |
|                        | 2  | 3  | P01857_IGHG1_HUMAN | IGHG1    | 36.08  | Ig gamma-1 chain C region                                              | Yes | No  | 8.46  |
|                        | 2  | 2  | P04406_G3P_HUMAN   | GAPDH    | 36.03  | Glyceraldehyde-3-phosphate dehydrogenase                               | No  | Yes | 8.58  |
|                        | 2  | 2  | P62805_H4_HUMAN    | HIST1H4A | 11.36  | Histone H4                                                             | No  | Yes | 6.92  |
|                        | 2  | 2  | P60709_ACTB_HUMAN  | ACTB     | 41.71  | Actin, cytoplasmic 1                                                   | No  | No  | 5.29  |
|                        | 2  | 2  | P04217_A1BG_HUMAN  | A1BG     | 54.22  | Alpha-1B-glycoprotein                                                  | Yes | No  | 5.63  |
|                        | 2  | 2  | P00748_FA12_HUMAN  | F12      | 67.75  | Coagulation factor XII                                                 | Yes | No  | 9     |
|                        | 2  | 2  | P32119_PRDX2_HUMAN | PRDX2    | 21.88  | Peroxiredoxin-2                                                        | No  | Yes | 5.67  |
|                        | 2  | 2  | P19823_ITIH2_HUMAN | ITIH2    | 106.4  | Inter-alpha-trypsin inhibitor heavy chain H2                           | Yes | Yes | 5.75  |
| <b>Band L (98 kDa)</b> |    |    |                    |          |        |                                                                        |     |     |       |
|                        | 19 | 26 | P00751_CFB_HUMAN   | CFB      | 85.48  | Complement factor B                                                    | Yes | Yes | 6.66  |
|                        | 18 | 21 | P06396_GELS_HUMAN  | GSN      | 85.64  | Gelsolin                                                               | No  | Yes | 5.72  |
|                        | 12 | 13 | P02787_TRFE_HUMAN  | TF       | 77.01  | Serotransferrin                                                        | Yes | Yes | 6.7   |
|                        | 8  | 8  | P10643_CO7_HUMAN   | C7       | 93.46  | Complement component C7                                                | Yes | No  | 6.09  |
|                        | 8  | 8  | P01024_CO3_HUMAN   | C3       | 187.03 | Complement C3                                                          | Yes | Yes | 6.02  |
|                        | 7  | 7  | P02647_APOA1_HUMAN | APOA1    | 30.76  | Apolipoprotein A-I                                                     | Yes | Yes | 5.56  |
|                        | 5  | 5  | P00747_PLMN_HUMAN  | PLG      | 90.51  | Plasminogen                                                            | Yes | Yes | 7.08  |
|                        | 4  | 4  | P05155_IC1_HUMAN   | SERPING1 | 55.12  | Plasma protease C1 inhibitor                                           | Yes | No  | 5.97  |
|                        | 4  | 4  | P01876_IGHA1_HUMAN | IGHA1    | 37.63  | Ig alpha-1 chain C region                                              | Yes | No  | 6.08  |
|                        | 4  | 4  | P04196_HRG_HUMAN   | HRG      | 59.54  | Histidine-rich glycoprotein                                            | Yes | No  | 7.03  |
|                        | 4  | 4  | P62987_RL40_HUMAN  | UBA52    | 14.72  | Ubiquitin-60S ribosomal protein L40                                    | No  | Yes | 10.32 |
|                        | 3  | 3  | P0C0L4_CO4A_HUMAN  | C4A      | 192.66 | Complement C4-A                                                        | Yes | Yes | 8.69  |

|                         |    |    |                    |          |        |                                                                        |     |     |       |
|-------------------------|----|----|--------------------|----------|--------|------------------------------------------------------------------------|-----|-----|-------|
|                         | 3  | 3  | P07355_ANXA2_HUMAN | ANXA2    | 38.58  | Annexin A2                                                             | No  | Yes | 7.56  |
|                         | 3  | 3  | P01008_ANT3_HUMAN  | SERPINC1 | 52.57  | Antithrombin-III                                                       | Yes | Yes | 5.95  |
|                         | 3  | 3  | P01009_A1AT_HUMAN  | SERPINA1 | 46.71  | Alpha-1-antitrypsin                                                    | Yes | Yes | 5.37  |
|                         | 3  | 3  | P35858_ALS_HUMAN   | IGFALS   | 65.99  | Insulin-like growth factor-binding protein complex acid labile subunit | Yes | No  | 6.13  |
|                         | 2  | 3  | P62736_ACTA_HUMAN  | ACTA2    | 41.98  | Actin, aortic smooth muscle                                            | No  | No  | 5.24  |
|                         | 2  | 2  | P32119_PRDX2_HUMAN | PRDX2    | 21.88  | Peroxiredoxin-2                                                        | No  | Yes | 5.67  |
|                         | 2  | 2  | P04406_G3P_HUMAN   | GAPDH    | 36.03  | Glyceraldehyde-3-phosphate dehydrogenase                               | No  | Yes | 8.58  |
|                         | 2  | 2  | Q14624_ITIH4_HUMAN | ITIH4    | 103.29 | Inter-alpha-trypsin inhibitor heavy chain H4                           | Yes | No  | 5.92  |
|                         | 2  | 2  | P01834_IGKC_HUMAN  | IGKC     | 11.6   | Ig kappa chain C region                                                | No  | No  | 5.58  |
|                         | 2  | 2  | P01857_IGHG1_HUMAN | IGHG1    | 36.08  | Ig gamma-1 chain C region                                              | Yes | No  | 8.46  |
|                         | 2  | 2  | Q15517_CDSN_HUMAN  | CDSN     | 51.49  | Corneodesmosin                                                         | Yes | No  | 8.48  |
|                         | 2  | 2  | P68104_EF1A1_HUMAN | EEF1A1   | 50.11  | Elongation factor 1-alpha 1                                            | No  | Yes | 9.1   |
|                         | 2  | 2  | Q06830_PRDX1_HUMAN | PRDX1    | 22.1   | Peroxiredoxin-1                                                        | No  | Yes | 8.27  |
|                         | 2  | 2  | P25311_ZA2G_HUMAN  | AZGP1    | 34.24  | Zinc-alpha-2-glycoprotein                                              | Yes | No  | 5.58  |
|                         | 2  | 2  | P01042_KNG1_HUMAN  | KNG1     | 71.91  | Kininogen-1                                                            | Yes | Yes | 6.23  |
|                         | 2  | 2  | O95969_SG1D2_HUMAN | SCGB1D2  | 9.92   | Secretoglobin family 1D member 2                                       | No  | No  | 8.58  |
|                         | 2  | 2  | P05546_HEP2_HUMAN  | SERPIND1 | 57.03  | Heparin cofactor 2                                                     | Yes | Yes | 6.26  |
| <b>Band M (121 kDa)</b> |    |    |                    |          |        |                                                                        |     |     |       |
|                         | 14 | 17 | P01024_CO3_HUMAN   | C3       | 187.03 | Complement C3                                                          | Yes | Yes | 6.02  |
|                         | 4  | 7  | P08123_CO1A2_HUMAN | COL1A2   | 129.24 | Collagen alpha-2(I) chain                                              | Yes | No  | 10.05 |
|                         | 4  | 4  | P00751_CFB_HUMAN   | CFB      | 85.48  | Complement factor B                                                    | Yes | Yes | 6.66  |
|                         | 3  | 3  | P07355_ANXA2_HUMAN | ANXA2    | 38.58  | Annexin A2                                                             | No  | Yes | 7.56  |
|                         | 3  | 3  | P62736_ACTA_HUMAN  | ACTA2    | 41.98  | Actin, aortic smooth muscle                                            | No  | No  | 5.24  |
|                         | 3  | 3  | P04040_CATA_HUMAN  | CAT      | 59.72  | Catalase                                                               | No  | Yes | 6.9   |
|                         | 3  | 3  | P19823_ITIH2_HUMAN | ITIH2    | 106.4  | Inter-alpha-trypsin inhibitor heavy chain H2                           | Yes | Yes | 5.75  |
|                         | 3  | 3  | P06396_GELS_HUMAN  | GSN      | 85.64  | Gelsolin                                                               | No  | Yes | 5.72  |
|                         | 2  | 3  | P19827_ITIH1_HUMAN | ITIH1    | 101.33 | Inter-alpha-trypsin inhibitor heavy chain H1                           | Yes | Yes | 6.33  |
|                         | 2  | 3  | Q15517_CDSN_HUMAN  | CDSN     | 51.49  | Corneodesmosin                                                         | Yes | No  | 8.48  |

|                             |   |   |                    |        |        |                                              |     |     |       |
|-----------------------------|---|---|--------------------|--------|--------|----------------------------------------------|-----|-----|-------|
|                             | 2 | 2 | P60709_ACTB_HUMAN  | ACTB   | 41.71  | Actin, cytoplasmic 1                         | No  | No  | 5.29  |
|                             | 2 | 2 | P14618_KPYM_HUMAN  | PKM    | 57.9   | Pyruvate kinase PKM                          | No  | Yes | 7.96  |
|                             | 2 | 2 | P04083_ANXA1_HUMAN | ANXA1  | 38.69  | Annexin A1                                   | No  | Yes | 10.05 |
|                             | 2 | 2 | P02452_CO1A1_HUMAN | COL1A1 | 138.86 | Collagen alpha-1(I) chain                    | Yes | Yes | 9.29  |
| <b>Band N (140-250 kDa)</b> |   |   |                    |        |        |                                              |     |     |       |
|                             | 2 | 3 | P19827_ITIH1_HUMAN | ITIH1  | 101.33 | Inter-alpha-trypsin inhibitor heavy chain H1 | Yes | Yes | 6.33  |
|                             | 2 | 3 | Q6UWP8_SBSN_HUMAN  | SBSN   | 60.5   | Suprabasin                                   | No  | No  | 6.45  |
|                             | 2 | 2 | P19823_ITIH2_HUMAN | ITIH2  | 106.4  | Inter-alpha-trypsin inhibitor heavy chain H2 | Yes | Yes | 5.75  |
